# Supplementary material for: Melanopsin activates divergent phototransduction pathways in intrinsically photosensitive retinal ganglion cell subtypes
Source: eLife. 2023 Nov 8;12:e80749. doi: 10.7554/eLife.80749 (PMC10712949; doi:10.7554/eLife.80749)
Supplement: Figure 1—figure supplement 1—source data 1. [file elife-80749-fig1-figsupp1-data1.xlsx]

## Sheet: Capacitance
n= sample size	Control	TRPC3/6/7 KO
1	47.6197	51.1023
2	46.8964	43.289
3	54.9217	49.2627
4	43.6086	45.0895
5	48.3387	53.223
6	49.9856	42.3258
7	46.0479	45.3524
8	45.51	56.9523
9	48.3099	51.1068
10	45.8384	45.6296
11	50.6714	51.0823
12	47.6997

## Sheet: Rinp
n= sample size	Control	TRPC3/6/7 KO
1	94.9761	89.2357
2	98.4542	107.926
3	100.357	103.653
4	100.357	107.411
5	120.156	101.119
6	97.555	123.884
7	84.1852	103.982
8	107.543	102.636
9	106.994	104.388
10	116.131	102.618
11	107.956	93.3415
12	98.0489
