# Supplementary material for: Melanopsin activates divergent phototransduction pathways in intrinsically photosensitive retinal ganglion cell subtypes
Source: eLife. 2023 Nov 8;12:e80749. doi: 10.7554/eLife.80749 (PMC10712949; doi:10.7554/eLife.80749)
Supplement: Figure 1—source data 1. [file elife-80749-fig1-data1.xlsx]

## Sheet: Maximum
n= sample size	Control	TRPC3/6/7 KO
1	86.0255	89.2212
2	62.618	74.2049
3	59.1804	36.1529
4	87.1706	50.9965
5	160.415
6	124.31
7	56.9158

## Sheet: Early
n= sample size	Control	TRPC3/6/7 KO
1	42.6467	25.9945
2	23.8874	9.19558
3	24.9495	5.46652
4	26.6055	7.09492
5	91.6043
6	47.3207
7	22.9837

## Sheet: Intermediate
n= sample size	Control	TRPC3/6/7 KO
1	67.4673	62.5777
2	52.9851	47.8719
3	48.1698	23.2531
4	55.0448	31.3862
5	132.741
6	95.7435
7	36.5862

## Sheet: Late
n= sample size	Control	TRPC3/6/7 KO
1	78.2992	77.2749
2	52.9164	50.8419
3	49.4151	28.1003
4	72.3407	40.1756
5	147.146
6	114.342
7	35.1659
