# Supplementary material for: Melanopsin activates divergent phototransduction pathways in intrinsically photosensitive retinal ganglion cell subtypes
Source: eLife. 2023 Nov 8;12:e80749. doi: 10.7554/eLife.80749 (PMC10712949; doi:10.7554/eLife.80749)
Supplement: Figure 2—figure supplement 1—source data 1. [file elife-80749-fig2-figsupp1-data1.xlsx]

## Sheet: Tail Current
n= sample size	Control Dark	Control Light
1	103.37	103.307
2	52.0406	45.259
3	81.088	80.581
4	84.593	66.836

## Sheet: HCN Current
n= sample size	Control Dark	Control Light
1	383.53	385.823
2	246.095	255.207
3	289.626	280.37
4	279.053	248.582

## Sheet: Change in holding current
n= sample size	Control Dark	Control Light
1	0	-39.622
2	0	-48.1884
3	0	-58.7586
4	0	-67.354
