# Supplementary material for: Melanopsin activates divergent phototransduction pathways in intrinsically photosensitive retinal ganglion cell subtypes
Source: eLife. 2023 Nov 8;12:e80749. doi: 10.7554/eLife.80749 (PMC10712949; doi:10.7554/eLife.80749)
Supplement: Figure 2—figure supplement 2—source data 1. [file elife-80749-fig2-figsupp2-data1.xlsx]

## Sheet: Tail Current
n= sample size	Control (20min)	50uM ZD7288 (20min)
1	38.2442	2.4482
2	18.6992	3.524
3	28.0954	8.0064
4	37.4142	8.1402
5	29.9532	15.5102

## Sheet: Maximum
n= sample size	Control (20min)	50uM ZD7288 (20min)
1	153.035	41.8553
2	131.236	7.05975
3	119.183	31.4213
4	111.394	9.6601

## Sheet: Early
n= sample size	Control (20min)	50uM ZD7288 (20min)
1	28.4625	0.339772
2	53.9099	0.704939
3	45.1295	1.78789
4	36.5944	1.2216

## Sheet: Intermediate
n= sample size	Control (20min)	50uM ZD7288 (20min)
1	117.912	21.757
2	116.815	10.3046
3	106.173	12.0225
4	86.1041	5.44627

## Sheet: Late
n= sample size	Control (20min)	50uM ZD7288 (20min)
1	144.707	34.2222
2	119.616	6.01753
3	106.518	21.5605
4	101.419	5.27315

## Sheet: Tail Current Comparison
n= sample size	50uM ZD7288 (5min)	50uM ZD7288 (20min)
1	16.201	2.4482
2	22.7142	3.524
3	11.56	8.0064
4	6.1868	8.1402
5	7.6696	15.5102

## Sheet: Input Resistance
n= sample size	Control (5min)	50uM ZD7288 (5min)	Control (20min)	50uM ZD7288 (20min)
1	144.751	100.983	140.068	127.244
2	124.959	138.471	114.08	154.774
3	75.9028	175.025	70.6219	214.184
4	85.8235	147.49	96.677	192.617
5	124.705	123.281	128.134	146.629
