# Supplementary material for: Melanopsin activates divergent phototransduction pathways in intrinsically photosensitive retinal ganglion cell subtypes
Source: eLife. 2023 Nov 8;12:e80749. doi: 10.7554/eLife.80749 (PMC10712949; doi:10.7554/eLife.80749)
Supplement: Figure 2—source data 1. [file elife-80749-fig2-data1.xlsx]

## Sheet: Tail Current
n= sample size	Control (5min)	50uM ZD7288 (5min)
1	114.487	16.201
2	78.0356	22.7142
3	99.432	11.56
4	152.074	6.1868
5	125.691	7.6696

## Sheet: Maximum
n= sample size	Control (5min)	50uM ZD7288 (5min)
1	86.0255	80.1571
2	62.618	124.149
3	59.1804	52.71
4	87.1706	79.8433
5	160.415	118.371
6	124.31
7	56.9158

## Sheet: Early
n= sample size	Control (5min)	50uM ZD7288 (5min)
1	42.6467	28.3789
2	23.8874	20.7648
3	24.9495	18.4337
4	26.6055	45.2662
5	91.6043	65.7467
6	47.3207
7	22.9837

## Sheet: Intermediate
n= sample size	Control (5min)	50uM ZD7288 (5min)
1	67.4673	53.8422
2	52.9851	70.2441
3	48.1698	34.8893
4	55.0448	51.7889
5	132.741	68.5774
6	95.7435
7	36.5862

## Sheet: Late
n= sample size	Control (5min)	50uM ZD7288 (5min)
1	78.2992	73.9556
2	52.9164	110.202
3	49.4151	47.4639
4	72.3407	71.0319
5	147.146	104.771
6	114.342
7	35.1659
