# Supplementary material for: Melanopsin activates divergent phototransduction pathways in intrinsically photosensitive retinal ganglion cell subtypes
Source: eLife. 2023 Nov 8;12:e80749. doi: 10.7554/eLife.80749 (PMC10712949; doi:10.7554/eLife.80749)
Supplement: Figure 3—source data 1. [file elife-80749-fig3-data1.xlsx]

## Sheet: Graph
Vhold	ZD7288 Sensitive Tail Current IV (Mean)	SEM	Control Light Evoked IV (Mean)	SEM	TRPC3/6/7 KO Light Evoked IV (Mean)	SEM
40			-94.335	24.1872	-259.531	36.1643
0			-136.793	25.3082	-177.513	15.7603
-40			-122.924	10.924	-115.68	20.6957
-66	-133.159	19.4956
-76	-172.019	31.7014
-80			-71.0557	14.93	-54.5304	6.24322
-86	-211.376	40.4918
-96	-237.161	41.8016
-106	-272.222	45.667
-120			86.0078	25.854	78.8285	15.1074
