# Supplementary material for: Melanopsin activates divergent phototransduction pathways in intrinsically photosensitive retinal ganglion cell subtypes
Source: eLife. 2023 Nov 8;12:e80749. doi: 10.7554/eLife.80749 (PMC10712949; doi:10.7554/eLife.80749)
Supplement: Figure 4—source data 1. [file elife-80749-fig4-data1.xlsx]

## Sheet: Tail Current
n= sample size	Control (5min)	50uM ZD7288 (5min)
1	17.0846	6.668
2	17.8122	2.4822
3	21.7406	11.6628
4	20.7596	2.348
5	14.8936	1.9632
6	19.2476	1.6198
7	34.7166	2.831
8	19.8778	2.554
9	47.2816	3.7522

## Sheet: Maximum
n= sample size	Control (5min)	50uM ZD7288 (5min)
1	58.5797	54.5381
2	68.4811	66.5135
3	41.1876	27.045
4	108.143	81.969
5	24.7214	23.3955
6	63.0154	28.0165
7	34.697	26.3976
8	68.9392	56.0559
9	65.5361	30.6506
10	23.0247	18.2398
11	24.6609	16.8485
12	38.4991	72.6768
13		24.9416
14		103.181
15		30.9436

## Sheet: Early
n= sample size	Control (5min)	50uM ZD7288 (5min)
1	35.541	42.7243
2	40.179	45.9909
3	30.6469	17.4989
4	78.1044	63.4836
5	7.87507	6.21085
6	48.7681	22.921
7	24.5923	9.12702
8	54.4834	11.4775
9	41.0998	6.12694
10	7.47609	12.6177
11	8.32372	4.79148
12	13.4954	56.1899
13		9.28
14		82.4365
15		6.16046

## Sheet: Intermediate
n= sample size	Control (5min)	50uM ZD7288 (5min)
1	29.8961	24.0481
2	21.2223	25.9758
3	22.7785	23.0014
4	39.7241	32.8469
5	11.8168	12.3861
6	28.2234	9.49098
7	16.0732	19.9503
8	38.8968	42.8041
9	36.0554	24.1055
10	17.5933	8.64964
11	21.0576	12.3241
12	33.4569	31.5754
13		21.6633
14		49.0075
15		23.8595

## Sheet: Late
n= sample size	Control (5min)	50uM ZD7288 (5min)
1	26.3683	19.7973
2	11.3492	23.322
3	13.7413	19.6772
4	33.0313	33.4863
5	8.51466	9.87724
6	28.8037	8.36169
7	12.1251	22.0093
8	33.7251	45.3132
9	26.9133	26.1357
10	18.2913	8.22522
11	19.5845	13.3743
12	31.7281	20.2293
13		21.4154
14		41.6545
15		26.5921
