# Supplementary material for: Melanopsin activates divergent phototransduction pathways in intrinsically photosensitive retinal ganglion cell subtypes
Source: eLife. 2023 Nov 8;12:e80749. doi: 10.7554/eLife.80749 (PMC10712949; doi:10.7554/eLife.80749)
Supplement: Figure 5—figure supplement 1—source data 1. [file elife-80749-fig5-figsupp1-data1.xlsx]

## Sheet: Capacitance
n= sample size	Control	TRPC3/6/7 KO
1	31.5324	23.0227
2	42.5455	45.416
3	42.5498	47.1438
4	51.7728	34.1288
5	40.8511	43.9653
6	50.7288	41.7745
7	47.6076	42.0878
8	34.0889	35.9008
9	41.6098	45.3677
10	47.1482
11	37.1638

## Sheet: Rinp
n= sample size	Control	TRPC3/6/7 KO
1	302.659	386.518
2	223.776	210.729
3	224.584	202.446
4	184.686	277.778
5	225.102	218.549
6	188.146	227.107
7	201.476	228.38
8	272.861	262.525
9	229.592	215.475
10	201.698
11	254.991
