# Supplementary material for: Melanopsin activates divergent phototransduction pathways in intrinsically photosensitive retinal ganglion cell subtypes
Source: eLife. 2023 Nov 8;12:e80749. doi: 10.7554/eLife.80749 (PMC10712949; doi:10.7554/eLife.80749)
Supplement: Figure 5—source data 1. [file elife-80749-fig5-data1.xlsx]

## Sheet: Maximum
n= sample size	Control	TRPC3/6/7 KO
1	58.5797	9.29186
2	68.4811	18.872
3	41.1876	12.7836
4	108.143	17.0399
5	24.7214	11.7764
6	63.0154	10.515
7	34.697	10.5173
8	68.9392	13.6796
9	65.5361	12.9421
10	23.0247
11	24.6609
12	38.4991

## Sheet: Early
n= sample size	Control	TRPC3/6/7 KO
1	35.541	1.00808
2	40.179	0.220929
3	30.6469	0.53199
4	78.1044	2.056
5	7.87507	0.166248
6	48.7681	1.3605
7	24.5923	2.27611
8	54.4834	0.360568
9	41.0998	0.485965
10	7.47609
11	8.32372
12	13.4954

## Sheet: Intermediate
n= sample size	Control	TRPC3/6/7 KO
1	29.8961	4.58921
2	21.2223	12.3643
3	22.7785	7.26538
4	39.7241	9.16436
5	11.8168	8.17609
6	28.2234	8.07033
7	16.0732	8.83321
8	38.8968	1.9419
9	36.0554	10.9112
10	17.5933
11	21.0576
12	33.4569

## Sheet: Late
n= sample size	Control	TRPC3/6/7 KO
1	26.3683	5.20154
2	11.3492	9.59074
3	13.7413	4.81449
4	33.0313	7.97994
5	8.51466	9.56733
6	28.8037	6.82826
7	12.1251	9.07333
8	33.7251	1.75609
9	26.9133	11.0474
10	18.2913
11	19.5845
12	31.7281
