# Supplementary material for: Melanopsin activates divergent phototransduction pathways in intrinsically photosensitive retinal ganglion cell subtypes
Source: eLife. 2023 Nov 8;12:e80749. doi: 10.7554/eLife.80749 (PMC10712949; doi:10.7554/eLife.80749)
Supplement: Figure 6—source data 1. [file elife-80749-fig6-data1.xlsx]

## Sheet: Maximum
vhold	Control (Mean)	SEM	TRPC3/6/7 KO (Mean)	SEM
34	45.0804	12.8796	44.5873	14.1634
14	-11.4268	1.27105	14.7294	1.10917
-6	-13.0513	1.52922	-6.99736	3.87322
-26	-14.6449	2.46736	-13.2005	3.7379
-46	-27.0011	6.27941	-20.1436	5.12021
-66	-51.6238	7.27514	-13.0464	0.820684
-86			-11.0092	3.34703
-106	-79.8085	19.3242	-9.72693	1.50864

## Sheet: Early
vhold	Control (Mean)	SEM	TRPC3/6/7 KO (Mean)	SEM
34	8.34981	1.52298	3.64078	0.972381
14	-7.31955	3.61187	2.22869	0.99066
-6	-7.07438	2.64839	-1.84419	3.13715
-26	-6.71806	2.51082	-5.16193	3.45469
-46	-10.9285	5.0986	-2.16606	0.70119
-66	-32.5488	6.28493	-0.94071	0.444706
-86			-1.66704	0.796742
-106	-56.4162	16.9448	-1.6161	0.493975

## Sheet: Intermediate
vhold	Control (Mean)	SEM	TRPC3/6/7 KO (Mean)	SEM
34	22.5969	9.77615	20.2396	11.0914
14	-6.51181	2.70513	2.22197	4.58211
-6	-9.59771	1.39767	-6.81847	1.88546
-26	-11.881	2.08759	-6.8015	2.19863
-46	-14.7317	2.93857	-13.1734	4.60783
-66	-26.3995	2.69344	-7.924	1.92823
-86			-5.67714	2.48335
-106	-25.3951	4.90382	-4.50198	0.956354

## Sheet: Late
vhold	Control (Mean)	SEM	TRPC3/6/7 KO (Mean)	SEM
34	27.0471	12.0315	29.4093	14.6677
14	-6.50624	3.52117	7.45436	2.99361
-6	-10.428	1.61387	-2.26888	5.60068
-26	-12.1088	2.23064	-5.76945	2.38544
-46	-11.8752	1.81058	-11.9754	4.78182
-66	-22.0146	2.64563	-7.31768	2.00175
-86			-4.90907	3.29327
-106	-21.4104	3.86127	-4.33146	1.04971
