# Supplementary material for: Melanopsin activates divergent phototransduction pathways in intrinsically photosensitive retinal ganglion cell subtypes
Source: eLife. 2023 Nov 8;12:e80749. doi: 10.7554/eLife.80749 (PMC10712949; doi:10.7554/eLife.80749)
Supplement: Figure 7—source data 1. [file elife-80749-fig7-data1.xlsx]

## Sheet: Graph
Vhold	ZD7288 Sensitive Tail Current IV (Mean)	SEM	Control (Mean)	SEM	TRPC3/6/7 KO (Mean)	SEM
34			45.0804	12.8796	44.5873	14.1634
14			-11.4268	1.27105	14.7294	1.10917
-6			-13.0513	1.52922	-6.99736	3.87322
-26			-14.6449	2.46736	-13.2005	3.7379
-46			-27.0011	6.27941	-20.1436	5.12021
-66	-14.1623	2.5924	-51.6238	7.27514	-13.0464	0.820684
-76	-19.0377	3.38229			-11.0092	3.34703
-86	-25.2606	4.44684	-79.8085	19.3242	-9.72693	1.50864
-96	-28.3677	6.10024
-106	-31.3075	6.5079
