# Supplementary material for: Melanopsin activates divergent phototransduction pathways in intrinsically photosensitive retinal ganglion cell subtypes
Source: eLife. 2023 Nov 8;12:e80749. doi: 10.7554/eLife.80749 (PMC10712949; doi:10.7554/eLife.80749)
Supplement: Figure 8—source data 1. [file elife-80749-fig8-data1.xlsx]

## Sheet: IV Graph
Vhold	M1 Control Light Evoked IV (Mean)	SEM	M2 Control Light Evoked IV (Mean)	SEM
40	185.152	69.4642
34			45.0804	12.8796
14			-11.4268	1.27105
0	-6.70352	11.4823
-6			-13.0513	1.52922
-26			-14.6449	2.46736
-40	-73.7728	15.4699
-46			-27.0011	6.27941
-66			-51.6238	7.27514
-80	-263.024	42.287
-106			-79.8085	19.3242

## Sheet: M2 Maximum
n= sample size	Control	Control Ca2+ blockers
1	58.5797	42.7415
2	68.4811	22.5531
3	41.1876	21.6594
4	108.143	13.7888
5	24.7214
6	63.0154
7	34.697
8	68.9392
9	65.5361
10	23.0247
11	24.6609
12	38.4991

## Sheet: M2 Early
n= sample size	Control	Control Ca2+ blockers
1	35.541	24.2331
2	40.179	1.71254
3	30.6469	12.8011
4	78.1044	2.53108
5	7.87507
6	48.7681
7	24.5923
8	54.4834
9	41.0998
10	7.47609
11	8.32372
12	13.4954

## Sheet: M2 Intermediate
n= sample size	Control	Control Ca2+ blockers
1	29.8961	15.6503
2	21.2223	8.97466
3	22.7785	15.4207
4	39.7241	4.2357
5	11.8168
6	28.2234
7	16.0732
8	38.8968
9	36.0554
10	17.5933
11	21.0576
12	33.4569

## Sheet: M2 Late
n= sample size	Control	Control Ca2+ blockers
1	26.3683	14.3086
2	11.3492	12.0006
3	13.7413	11.2764
4	33.0313	4.78484
5	8.51466
6	28.8037
7	12.1251
8	33.7251
9	26.9133
10	18.2913
11	19.5845
12	31.7281

## Sheet: M1 Maximum
n= sample size	Control	Control Ca2+ blockers
1	409.955	407.849
2	101.273	237.035
3	235.342	90.3889
4	207.189	166.897
5	534.177	354.922
6	473.816	108.945
7	231.418	407.434

## Sheet: M1 Early
n= sample size	Control	Control Ca2+ blockers
1	141.883	297.068
2	74.5602	182.316
3	208.391	71.7695
4	169.714	141.953
5	328.962	256.009
6	442.741	76.6495
7	210.66	371.197

## Sheet: M1 Intermediate
n= sample size	Control	Control Ca2+ blockers
1	46.6244	54.1693
2	42.7039	39.4268
3	51.4392	29.6861
4	40.7511	38.3504
5	58.8448	48.1242
6	74.0599	33.8014
7	54.3224	110.171

## Sheet: M1 Late
n= sample size	Control	Control Ca2+ blockers
1	35.6385	7.79126
2	21.5562	4.10436
3	6.52351	16.7378
4	3.49943	6.97394
5	4.47832	14.5649
6	5.54982	3.48774
7	11.3075	17.4758
