# Supplementary material for: Melanopsin activates divergent phototransduction pathways in intrinsically photosensitive retinal ganglion cell subtypes
Source: eLife. 2023 Nov 8;12:e80749. doi: 10.7554/eLife.80749 (PMC10712949; doi:10.7554/eLife.80749)
Supplement: Figure 9—figure supplement 2—source data 1. [file elife-80749-fig9-figsupp2-data1.xlsx]

## Sheet: M2 Ca2+ Currents
vhold	Control (Mean)	SEM	10µM TTA-P2 (Mean)	SEM	TTA-P2 sensitive current	SEM
30	-34.8926	9.10269	-22.2878	5.25527	-19.3831	10.0608
20	-44.3531	11.8355	-31.2896	5.7543	-20.8804	10.1406
10	-58.9893	11.3218	-38.8939	6.38029	-23.5304	12.4279
0	-66.3808	11.6439	-44.9184	8.60312	-24.5433	12.3653
-10	-67.0965	9.60501	-47.9753	7.58078	-23.9069	7.06256
-20	-53.7014	8.3124	-37.2342	4.08904	-16.4672	7.49568
-30	-24.9259	4.10394	-10.9178	2.46912	-13.0855	3.4313
-40	-3.23769	0.921353	-2.52225	1.36231	-1.78371	0.724762
-50	-3.26605	0.435048	-1.43304	0.16803	-1.83302	0.329796
-60	-2.40216	0.672823	-3.11289	1.23824	-1.9096	0.424145

## Sheet: M1 Ca2+ Currents 
vhold	Control (Mean)	SEM	10µM TTA-P2 (Mean)	SEM	TTA-P2 sensitive current	SEM
30	-11.3452	0.7544	-5.29488	1.08477	-6.0503	3.33037
20	-17.109	1.85749	-12.6388	4.04846	-4.47018	2.19097
10	-23.7832	5.68876	-17.6132	7.75575	-6.17005	2.06699
0	-30.2757	7.63983	-21.4671	8.59644	-8.80859	0.956612
-10	-28.4347	8.23601	-24.8179	7.75535	-3.61682	0.48066
-20	-22.0758	5.55703	-20.605	10.11	-4.55296	1.47078
-30	-8.59736	4.31128	-12.9141	6.79335	-4.31677	2.48207
-40	-3.43263	0.342357	-6.17893	1.72103	-3.37867	2.7463
-50	-3.16734	0.583894	-5.88401	0.384715	-2.71667	0.199179
-60	-4.41868	0.0119729	-2.44981	1.21875	-1.96888	1.20678
