# Supplementary material for: Melanopsin activates divergent phototransduction pathways in intrinsically photosensitive retinal ganglion cell subtypes
Source: eLife. 2023 Nov 8;12:e80749. doi: 10.7554/eLife.80749 (PMC10712949; doi:10.7554/eLife.80749)
Supplement: Figure 9—source data 1. [file elife-80749-fig9-data1.xlsx]

## Sheet: M2 Maximum
n= sample size	Control	10µM TTA-P2
1	58.5797	7.27847
2	68.4811	8.01717
3	41.1876	11.9508
4	108.143	7.78518
5	24.7214	12.7876
6	63.0154	20.3979
7	34.697	12.4752
8	68.9392	12.8724
9	65.5361	24.343
10	23.0247
11	24.6609
12	38.4991

## Sheet: M2 Early
n= sample size	Control	10µM TTA-P2
1	35.541	3.38343
2	40.179	0.83137
3	30.6469	5.27457
4	78.1044	0.790475
5	7.87507	0.293849
6	48.7681	6.06699
7	24.5923	1.02961
8	54.4834	3.65417
9	41.0998	18.0287
10	7.47609
11	8.32372
12	13.4954

## Sheet: M2 Intermediate
n= sample size	Control	10µM TTA-P2
1	29.8961	3.71789
2	21.2223	0.370107
3	22.7785	4.26699
4	39.7241	1.9857
5	11.8168	4.98973
6	28.2234	6.58062
7	16.0732	7.08494
8	38.8968	6.87466
9	36.0554	11.7611
10	17.5933
11	21.0576
12	33.4569

## Sheet: M2 Late
n= sample size	Control	10µM TTA-P2
1	26.3683	2.57719
2	11.3492	1.6379
3	13.7413	2.39427
4	33.0313	3.12371
5	8.51466	6.93595
6	28.8037	2.94902
7	12.1251	9.09318
8	33.7251	6.38566
9	26.9133	12.5959
10	18.2913
11	19.5845
12	31.7281

## Sheet: M1 Maximum
n= sample size	Control	10µM TTA-P2
1	409.955	469.681
2	101.273	164.75
3	235.342	392.672
4	207.189	270.425
5	534.177	232.422
6	473.816	194.07
7	231.418	201.183

## Sheet: M1 Early
n= sample size	Control	10µM TTA-P2
1	141.883	440.26
2	74.5602	148.044
3	208.391	372.649
4	169.714	229.076
5	328.962	189.523
6	442.741	171.985
7	210.66	163.375

## Sheet: M1 Intermediate
n= sample size	Control	10µM TTA-P2
1	46.6244	87.8085
2	42.7039	37.1913
3	51.4392	59.4048
4	40.7511	50.2356
5	58.8448	50.678
6	74.0599	53.8567
7	54.3224	28.7621

## Sheet: M1 Late
n= sample size	Control	10µM TTA-P2
1	35.6385	8.86861
2	21.5562	15.0434
3	6.52351	5.46119
4	3.49943	12.4468
5	4.47832	3.27802
6	5.54982	6.37883
7	11.3075	4.7936
