# Supplementary material for: Melanopsin activates divergent phototransduction pathways in intrinsically photosensitive retinal ganglion cell subtypes
Source: eLife. 2023 Nov 8;12:e80749. doi: 10.7554/eLife.80749 (PMC10712949; doi:10.7554/eLife.80749)
Supplement: Figure 10—source data 1. [file elife-80749-fig10-data1.xlsx]

## Sheet: Maximum
n= sample size	Control	10μM Mibefradil Dihydrochloride	TRPC3/6/7 KO	TRPC3/6/7 KO + 10μM Mibefradil Dihydrochloride
1	58.5797	12.6375	9.29186	8.22376
2	68.4811	6.27146	18.872	14.8436
3	41.1876	18.5942	12.7836	7.70041
4	108.143	13.1711	17.0399	14.3334
5	24.7214	24.7917	11.7764
6	63.0154		10.515
7	34.697		10.5173
8	68.9392		13.6796
9	65.5361		12.9421
10	23.0247
11	24.6609
12	38.4991

## Sheet: Early
n= sample size	Control	10μM Mibefradil Dihydrochloride	TRPC3/6/7 KO	TRPC3/6/7 KO + 10μM Mibefradil Dihydrochloride
1	35.541	2.87334	1.00808	0.0407319
2	40.179	0.909348	0.220929	1.7107
3	30.6469	11.0287	0.53199	2.82028
4	78.1044	4.14682	2.056	0.0648927
5	7.87507	18.2497	0.166248
6	48.7681		1.3605
7	24.5923		2.27611
8	54.4834		0.360568
9	41.0998		0.485965
10	7.47609
11	8.32372
12	13.4954

## Sheet: Intermediate
n= sample size	Control	10μM Mibefradil Dihydrochloride	TRPC3/6/7 KO	TRPC3/6/7 KO + 10μM Mibefradil Dihydrochloride
1	29.8961	8.56265	4.58921	4.34582
2	21.2223	0.214001	12.3643	9.14742
3	22.7785	11.1932	7.26538	0.166747
4	39.7241	8.41289	9.16436	8.79978
5	11.8168	17.9303	8.17609
6	28.2234		8.07033
7	16.0732		8.83321
8	38.8968		1.9419
9	36.0554		10.9112
10	17.5933
11	21.0576
12	33.4569

## Sheet: Late
n= sample size	Control	10μM Mibefradil Dihydrochloride	TRPC3/6/7 KO	TRPC3/6/7 KO + 10μM Mibefradil Dihydrochloride
1	26.3683	7.61881	5.20154	5.3803
2	11.3492	1.52843	9.59074	12.3032
3	13.7413	11.7191	4.81449	2.53217
4	33.0313	7.41936	7.97994	9.15776
5	8.51466	18.5154	9.56733
6	28.8037		6.82826
7	12.1251		9.07333
8	33.7251		1.75609
9	26.9133		11.0474
10	18.2913
11	19.5845
12	31.7281
